# Supplementary material
Source: MDPI journal article supplement (https://www.mdpi.com/2073-4344/7/12/355)
Supplement: s1 [file s1]

## Supplementary Materials

### Catalytic Activities of Ribozymes and DNAzymes in Water and Mixed Aqueous Media

Shu-ichi Nakano, Masao Horita, Miku Kobayashi, and Naoki Sugimoto

**Table S1.** Fold increase in the rate of the **17E(S)**-catalyzed single-turnover reaction in mixed solutions in the presence of 10 mM MgCl<sub>2</sub> over the rates in the absence of organic additives

| Solution <sup>1</sup> | Fold increase | Solution <sup>1</sup> | Fold increase | Solution <sup>1</sup> | Fold increase |
|-----------------------|---------------|-----------------------|---------------|-----------------------|---------------|
| PEG20000              | 0.71          | PDO                   | 0.32          | FA                    | <0.0003       |
| PEG8000               | 0.51          | MME                   | 0.093         | DMF                   | <0.0003       |
| PEG2000               | 0.43          | DME                   | 0.25          | AcAm                  | 0.0086        |
| PEG600                | 0.29          | MeOH                  | 0.28          | AcCN                  | 0.017         |
| PEG200                | 0.25          | EtOH                  | 0.11          | DMSO                  | 0.092         |
| EG                    | 0.35          | PrOH                  | 0.0048        | DOX                   | 0.062         |
| Glyc                  | 0.46          | Urea                  | <0.0003       | Dex                   | 0.70          |

<sup>1</sup> Abbreviations: PEG (polyethylene glycol with an average molecular weight ranging from  $2 \times 10^4$  to  $2 \times 10^5$ ), EG (ethylene glycol), Glyc (glycerol), PDO (1,3-propanediol), MME (2-methoxyethanol), DME (1,2-dimethoxyethane), MeOH (methanol), EtOH (ethanol), PrOH (1-propanol), FA (formamide), DMF (*N,N*-dimethylformamide), AcAm (acetamide), AcCN (acetonitrile), DMSO (dimethyl sulfoxide), DOX (1,4-dioxane), and Dex (dextran with an average molecular weight of  $1 \times 10^4$ ).

16

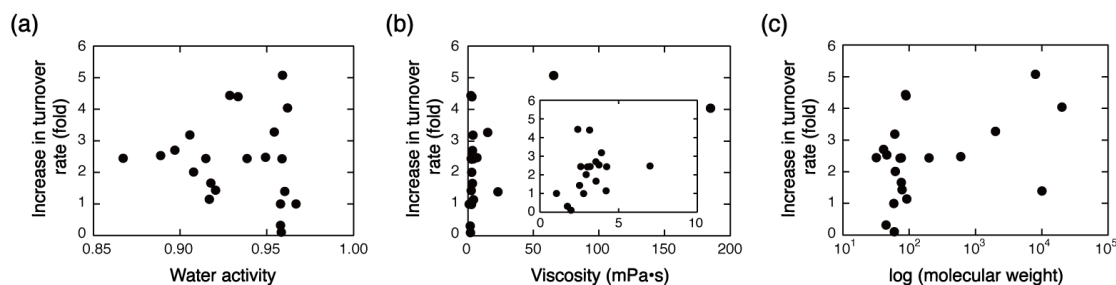

**Figure S1.** Plots of the increments of the turnover rate of the **HH(S)**-catalyzed reaction in the presence of 10 mM  $\text{MgCl}_2$  against (a) water activity, (b) viscosity, or (c) the logarithm of the additives' molecular weight.

17

18

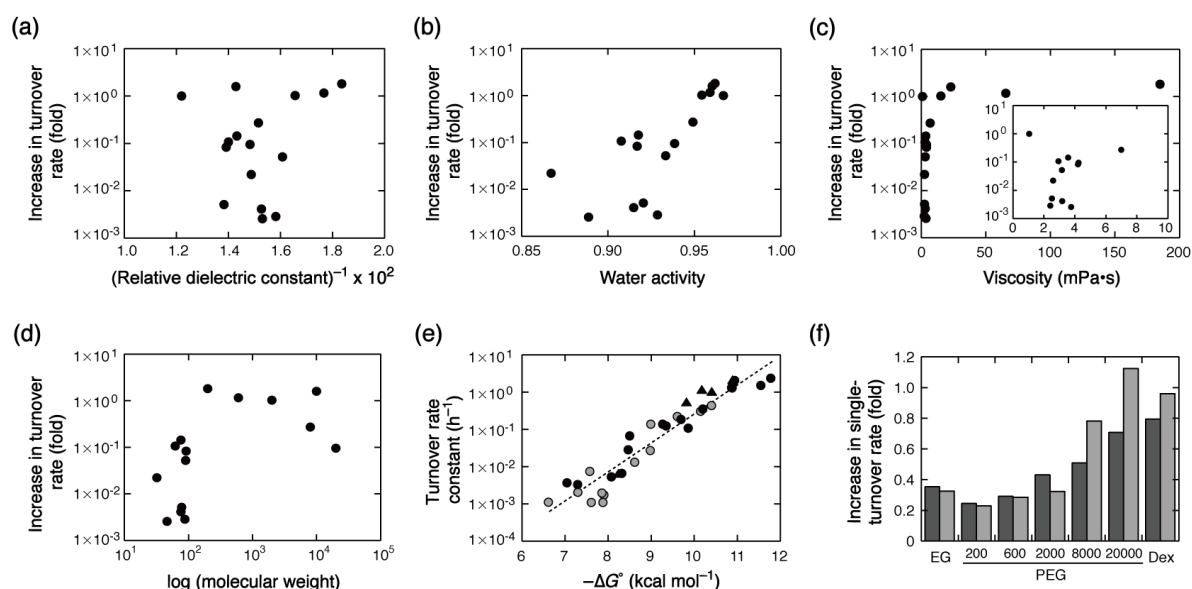

**Figure S2.** Plots of the increments of the turnover rate of the **17E(S)**-catalyzed reaction in the presence of 10 mM  $\text{MgCl}_2$  against (a) the inverse of the relative dielectric constant, (b) water activity, (c) viscosity, (d) the logarithm of the additives' molecular weight, or (e) the free energy change at 37°C (the symbols are the same those in Table 2e). (f) Increments of the single-turnover rates of the reactions catalyzed by **17E(S)** (black) or **17E(L)** (gray) in solutions containing 10 mM  $\text{MgCl}_2$ , with EG, PEGs, or Dex.

19
